# Supplementary material
Source: PubMed Central journal article supplement (PMC3139012)

**Supplementary Figure 1. Venn diagram indicating overlap of the top ten, best single-, two-, and three-gene diet classifiers.** **a)** Classifier overlap at the initiation stage (12 h) for three pair-wise comparisons: Fish versus olive oil, fish versus corn oil, and olive versus corn oil. None of the top ten classifiers (1-, 2-, and 3 genes) were common for all three pair-wise comparisons. **b)** Classifier overlap at the progression stage (10 wk) for the three pair-wise comparisons. In total, 6 classifiers (1-, 2-, and 3) were common for all three pair-wise comparisons.

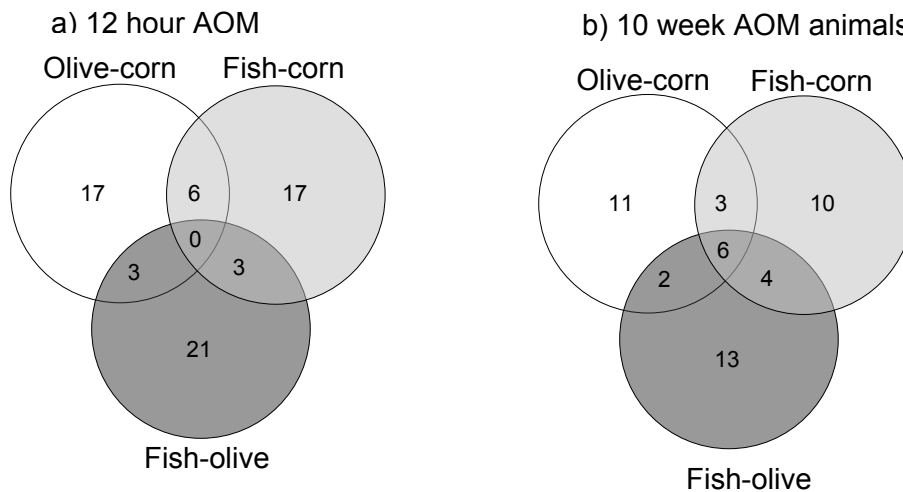

Supplement: NIHMS285904-supplement-Figure.pdf [file NIHMS285904-supplement-Figure.pdf]
