# Supplementary material
Source: PubMed Central journal article supplement (PMC3139012)
Supplement: NIHMS285904-supplement-Table.pdf [file NIHMS285904-supplement-Table.pdf]

**Supplementary Table 1. Inversely regulated (differentially expressed) genes at the initiation and progression stages: Fish vs olive oil comparison.** Fold change (relative expression) at 12 h and 10 wk represents fish oil divided by olive oil expression level. All genes have a p-value less than 0.05, indicating that genes were differentially expressed by diet. Only Entrez annotated genes are shown.

| Gene symbol | fold change (12 h) | fold change (10 wk) | Description                                                                      |
|-------------|--------------------|---------------------|----------------------------------------------------------------------------------|
| Tnc         | 0.4                | 1.4                 | Tenascin C                                                                       |
| Sec24a      | 0.7                | 1.2                 | SEC24 family, member A ( <i>S. cerevisiae</i> )                                  |
| Lpgat1      | 0.7                | 1.2                 | Similar to lysophosphatidylglycerol acyltransferase 1                            |
| Gja1        | 0.7                | 1.4                 | Gap junction protein, alpha 1                                                    |
| Efnb3       | 1.3                | 0.8                 | Ephrin B3                                                                        |
| Arhgef19    | 0.7                | 1.8                 | Rho guanine nucleotide exchange factor (GEF) 19                                  |
| Ube2g2      | 0.9                | 1.1                 | Ubiquitin-conjugating enzyme E2G 2                                               |
| Gpx7        | 0.7                | 1.6                 | Glutathione peroxidase 7                                                         |
| Upf3b       | 0.7                | 1.4                 | UPF3 regulator of nonsense transcripts homolog B (yeast)                         |
| Hnrnpa1     | 0.5                | 1.4                 | Heterogeneous nuclear ribonucleoprotein A1                                       |
| Fktn        | 0.7                | 1.2                 | Fukutin                                                                          |
| Klhdc8a     | 0.6                | 1.7                 | Kelch domain containing 8A                                                       |
| Klc2        | 0.6                | 1.3                 | Kinesin light chain 2                                                            |
| Abca1       | 0.7                | 1.4                 | ATP-binding cassette, sub-family A (ABC1), member 1                              |
| Rtf1        | 0.7                | 1.3                 | Rtf1, Paf1/RNA polymerase II complex component, homolog ( <i>S. cerevisiae</i> ) |
| Pitpnm1     | 0.8                | 1.2                 | Phosphatidylinositol transfer protein, membrane-associated 1                     |
| Ccdc22      | 0.8                | 1.5                 | Coiled-coil domain containing 22                                                 |
| Dis3l2      | 1.2                | 0.8                 | DIS3 mitotic control homolog ( <i>S. cerevisiae</i> )-like 2                     |
| Morc3       | 0.7                | 1.3                 | Microrchidia 3                                                                   |
| Polr3a      | 0.7                | 1.2                 | Polymerase (RNA) III (DNA directed) polypeptide A, 155kDa                        |
| Doc2g       | 0.5                | 1.7                 | Double C2, gamma                                                                 |
| Aldh18a1    | 0.6                | 1.3                 | Pyrroline-5-carboxylate synthetase (glutamate gamma-semialdehyde synthetase)     |
| Bnip2       | 0.7                | 1.5                 | BCL2/adenovirus E1B interacting protein 2                                        |
| Prkci       | 0.7                | 1.2                 | Protein kinase C, iota                                                           |
| Aurkc       | 0.6                | 1.4                 | Aurora kinase C                                                                  |
| Sppl2b      | 0.9                | 1.2                 | Signal peptide peptidase-like 2B                                                 |
| Sgsm2       | 0.7                | 1.4                 | Small G protein signaling modulator 2                                            |
| Pias2       | 0.8                | 1.3                 | Protein inhibitor of activated STAT, 2                                           |
| Rnf14       | 0.6                | 1.4                 | Ring finger protein 14                                                           |
| Ewsr1       | 0.7                | 1.3                 | Ewing sarcoma breakpoint region 1                                                |
| Adra2a      | 0.7                | 1.4                 | Adrenergic, alpha-2A-, receptor                                                  |

|         |     |     |                                                            |
|---------|-----|-----|------------------------------------------------------------|
| Mmp11   | 0.7 | 1.3 | Matrix metalloproteinase 11                                |
| Cpt1b   | 0.5 | 2.0 | Carnitine palmitoyltransferase 1b, muscle                  |
| Alox5ap | 0.7 | 1.2 | Arachidonate 5-lipoxygenase activating protein             |
| Pla2g2c | 0.7 | 1.4 | Phospholipase A2, group IIC                                |
| Zfp386  | 0.6 | 1.4 | Zinc finger protein 386 (Kruppel-like)                     |
| Sfrs12  | 0.6 | 1.3 | Splicing factor, arginine/serine-rich 12                   |
| Adam15  | 0.8 | 1.7 | A disintegrin and metalloproteinase domain 15 (metargidin) |
| Shank3  | 1.2 | 0.8 | SH3 and multiple ankyrin repeat domains 3                  |
| Tcf4    | 1.3 | 0.5 | Transcription factor 4                                     |
| Fxc1    | 0.7 | 1.3 | Fractured callus expressed transcript 1                    |
| socs3   | 0.7 | 1.3 | Suppressor of cytokine signaling 3                         |
| nelf    | 0.7 | 1.6 | Nasal embryonic LHRH factor                                |
| Pank4   | 0.9 | 1.2 | Pantothenate kinase 4                                      |
| Mxd3    | 0.7 | 1.4 | Max dimerization protein 3                                 |

**Represents the complete list of inversely regulated differentially expressed genes (annotated genes plus other GenBank accession ID numbers).**

**Fish vs olive oil comparison.** Fold change (relative expression) at 12 h and 10 wk represents fish oil divided by olive oil expression level. All genes have a p-value less than 0.05, indicating that genes were differentially expressed by diet.

(\*Represents an Entrez annotated gene).

| Gene identifier | Fold change (12 h) | Fold change (10 wk) | Description                                                                                         |
|-----------------|--------------------|---------------------|-----------------------------------------------------------------------------------------------------|
| AA801116        | 0.605386           | 1.372712976         | EST190613 Rattus norvegicus cDNA, 5 end                                                             |
| AA849738        | 0.733118           | 1.307226378         | EST192505 Normalized rat muscle, Bento Soares Rattus sp. cDNA clone RMUI31 3 end, mRNA sequence.    |
| AA892824        | 0.447732           | 1.421612232         | Tenascin C*                                                                                         |
| AA894084        | 0.794113           | 1.191405893         | Transcribed locus                                                                                   |
| AA963874        | 0.613438           | 1.518926436         | Similar to RIKEN cDNA 2700081O15                                                                    |
| AI010342        | 0.742964           | 1.440043108         | Transcribed locus                                                                                   |
| AI012573        | 0.769069           | 1.562725084         | EST207024 Normalized rat placenta, Bento Soares Rattus sp. cDNA clone RPLAZ10 3 end, mRNA sequence. |
| AI102744        | 0.712772           | 1.322451671         | Transcribed locus                                                                                   |
| AI170671        | 0.69375            | 1.549158759         | Transcribed locus                                                                                   |
| AI171975        | 0.738909           | 1.237994581         | SEC24 family, member A (S. cerevisiae)*                                                             |
| AI235950        | 0.527667           | 1.436432301         | EST232512 Normalized rat                                                                            |

|          |          |             |                                                                                                                          |
|----------|----------|-------------|--------------------------------------------------------------------------------------------------------------------------|
|          |          |             | ovary, Bento Soares Rattus sp. cDNA clone ROVCZ23 3 end, mRNA sequence.                                                  |
| AI406322 | 0.696364 | 1.248114248 | Similar to lysophosphatidylglycerol acyltransferase 1 *                                                                  |
| AI407147 | 0.908604 | 1.284850052 | Similar to hypothetical protein FLJ13045                                                                                 |
| AI411352 | 0.672011 | 1.376677849 | Gap junction protein, alpha 1*                                                                                           |
| AI412662 | 1.280684 | 0.845270497 | Ephrin B3*                                                                                                               |
| AI556408 | 0.721782 | 1.767323326 | Rho guanine nucleotide exchange factor (GEF) 19*                                                                         |
| AI599349 | 0.717325 | 1.376241831 | Transcribed locus, strongly similar to NP_001028289.1 SLIT-ROBO Rho GTPase activating protein 3 isoform b [Homo sapiens] |
| AI713324 | 0.874607 | 1.130363668 | Ubiquitin-conjugating enzyme E2G 2*                                                                                      |
| AW142311 | 0.749108 | 1.552232859 | Glutathione peroxidase 7*                                                                                                |
| AW251339 | 0.874952 | 1.159338611 | Transcribed locus                                                                                                        |
| AW525099 | 0.664462 | 1.446207938 | UPF3 regulator of nonsense transcripts homolog B (yeast)*                                                                |
| AW532652 | 1.348466 | 0.530294981 | Transcription factor 4*                                                                                                  |
| AW915082 | 0.493959 | 1.372558843 | Heterogeneous nuclear ribonucleoprotein A1*                                                                              |
| AW915268 | 0.712479 | 1.221960796 | Fukutin*                                                                                                                 |
| AW915437 | 0.597325 | 1.745735512 | Kelch domain containing 8A*                                                                                              |
| AW915609 | 0.717386 | 1.367953319 | Transcribed locus                                                                                                        |
| AW915749 | 0.646363 | 1.297826923 | Kinesin light chain 2*                                                                                                   |
| AW916344 | 0.850456 | 1.089424336 | Similar to RIKEN cDNA 2310033P09                                                                                         |
| AW916925 | 0.694628 | 1.351174494 | Transcribed locus                                                                                                        |
| AW918387 | 0.714192 | 1.364878945 | ATP-binding cassette, sub-family A (ABC1), member 1*                                                                     |
| AW918816 | 1.227974 | 0.832933949 | Similar to paired immunoglobulin-like type 2 receptor beta                                                               |
| AW920557 | 0.597873 | 1.592106671 | Transcribed locus, strongly similar to XP_001077488.1 PREDICTED: similar to ankyrin repeat domain 25 [Rattus norvegicus] |
| BE096995 | 0.673887 | 1.330740254 | Rtf1, Paf1/RNA polymerase II complex component, homolog (S. cerevisiae)*                                                 |
| BE100607 | 0.777573 | 1.205236274 | Phosphatidylinositol transfer protein, membrane-associated 1*                                                            |
| BE106191 | 0.756113 | 1.466657494 | Coiled-coil domain containing 22*                                                                                        |
| BE109616 | 0.620803 | 1.252914528 | Transcribed locus                                                                                                        |
| BE111729 | 1.182556 | 0.849525407 | DIS3 mitotic control homolog (S. cerevisiae)-like 2*                                                                     |

|           |          |             |                                                                                                                                  |
|-----------|----------|-------------|----------------------------------------------------------------------------------------------------------------------------------|
| BE111888  | 0.677617 | 1.281199375 | Microrchidia 3*                                                                                                                  |
| BE113380  | 0.716689 | 1.227665053 | Polymerase (RNA) III (DNA directed) polypeptide A, 155kDa*                                                                       |
| BE113655  | 0.47818  | 1.745718572 | Double C2, gamma*                                                                                                                |
| BF281787  | 0.561814 | 1.290358549 | Pyrroline-5-carboxylate synthetase (glutamate gamma-semialdehyde synthetase)*                                                    |
| BF282292  | 0.700446 | 1.517825565 | BCL2/adenovirus E1B interacting protein 2*                                                                                       |
| BF282349  | 0.736624 | 1.255131045 | Similar to RIKEN cDNA 5830404H04                                                                                                 |
| BF284303  | 0.655769 | 1.60139477  | EST448894 Rat Gene Index, normalized rat, Rattus norvegicus cDNA Rattus norvegicus cDNA clone RGIEO12 3 sequence, mRNA sequence. |
| BF284699  | 0.736779 | 1.208711552 | Protein kinase C, iota*                                                                                                          |
| BF400684  | 0.827014 | 1.258132616 | Transcribed locus                                                                                                                |
| BF404590  | 0.652851 | 1.345592902 | Similar to GC-rich sequence DNA-binding factor homolog                                                                           |
| BF410389  | 0.628179 | 1.39121655  | Aurora kinase C*                                                                                                                 |
| BF411134  | 0.877252 | 1.189972307 | Signal peptide peptidase-like 2B*                                                                                                |
| BF418673  | 0.743461 | 1.252880659 | Similar to PRO1853 homolog                                                                                                       |
| BF419044  | 0.706455 | 1.352377576 | Small G protein signaling modulator 2*                                                                                           |
| BF523622  | 0.688812 | 1.434329019 | Transcribed locus                                                                                                                |
| BF544602  | 0.732666 | 1.339168966 | Transcribed locus                                                                                                                |
| BF549878  | 0.783693 | 1.254725695 | Protein inhibitor of activated STAT, 2*                                                                                          |
| BF558112  | 0.623839 | 1.380686713 | Ring finger protein 14*                                                                                                          |
| BF563670  | 0.744943 | 1.256384457 | Transcribed locus                                                                                                                |
| BG153269  | 0.705378 | 1.292188016 | Ewing sarcoma breakpoint region 1*                                                                                               |
| NM_012739 | 0.739523 | 1.437114489 | Adrenergic, alpha-2A-, receptor*                                                                                                 |
| NM_012980 | 0.717302 | 1.324009983 | Matrix metalloproteinase 11*                                                                                                     |
| NM_013200 | 0.476639 | 1.993146839 | Carnitine palmitoyltransferase 1b, muscle*                                                                                       |
| NM_017260 | 0.733665 | 1.229620395 | Arachidonate 5-lipoxygenase activating protein*                                                                                  |
| NM_019202 | 0.704905 | 1.39266764  | Phospholipase A2, group IIC*                                                                                                     |
| NM_019620 | 0.560647 | 1.396392003 | Zinc finger protein 386 (Kruppel-like)*                                                                                          |
| NM_020092 | 0.563368 | 1.303205863 | Splicing factor, arginine/serine-rich 12*                                                                                        |
| NM_020308 | 0.785159 | 1.703600431 | A disintegrin and metalloproteinase domain 15 (metargidin)*                                                                      |
| NM_021676 | 1.184099 | 0.755029019 | SH3 and multiple ankyrin repeat domains 3*                                                                                       |

|           |          |             |                                          |
|-----------|----------|-------------|------------------------------------------|
| NM_053369 | 1.297591 | 0.546649496 | Transcription factor 4                   |
| NM_053371 | 0.709766 | 1.275738821 | Fractured callus expressed transcript 1* |
| NM_053565 | 0.660999 | 1.259556641 | Suppressor of cytokine signaling 3*      |
| NM_057190 | 0.747128 | 1.587699629 | Nasal embryonic LHRH factor*             |
| NM_133531 | 0.875447 | 1.183066361 | Pantothenate kinase 4*                   |
| U43563    | 0.768518 | 1.414039087 | Similar to hypothetical protein FLJ20154 |
| U45986    | 0.696892 | 1.411170199 | Max dimerization protein 3*              |

**Supplementary Table 2. Inversely regulated genes at the initiation and progression stages: Fish vs corn oil comparison.** Fold change (relative expression) at 12 h and 10 wk represents fish oil divided by corn oil expression level. All genes have a p-value less than 0.05, indicating that genes were differentially expressed by diet. Only Entrez annotated genes are shown.

| Gene      | Fold change (12 h) | Fold change (10 wk) | Description                                                                |
|-----------|--------------------|---------------------|----------------------------------------------------------------------------|
| Gfpt2     | 1.5                | 0.6                 | Glutamine-fructose-6-phosphate transaminase 2                              |
| Chd7      | 0.7                | 1.9                 | Chromodomain helicase DNA binding protein 7                                |
| Pole3     | 1.2                | 0.8                 | Polymerase (DNA directed), epsilon 3 (p17 subunit)                         |
| Nf1       | 0.8                | 1.4                 | Neurofibromin 1                                                            |
| Cpt1b     | 0.6                | 1.8                 | Carnitine palmitoyltransferase 1b, muscle                                  |
| Slc10a1   | 0.4                | 2.6                 | Solute carrier family 10 (sodium/bile acid cotransporter family), member 1 |
| Kcnh3     | 1.3                | 0.7                 | Potassium voltage-gated channel, subfamily H (eag-related), member 3       |
| Sult1b1   | 1.3                | 0.7                 | Sulfotransferase family, cytosolic, 1B, member 1                           |
| Gpr12     | 1.2                | 0.8                 | G-protein coupled receptor 12                                              |
| Serpina3n | 1.6                | 0.7                 | Serine (or cysteine) peptidase inhibitor, clade A, member 3N               |
| Slc15a2   | 1.3                | 0.8                 | Solute carrier family 15 (H <sup>+</sup> /peptide transporter), member 2   |
| Gda       | 0.6                | 1.4                 | Guanine deaminase                                                          |
| Nox1      | 1.2                | 0.8                 | NADPH oxidase 1                                                            |
| Abcc5     | 1.2                | 0.7                 | ATP-binding cassette, sub-family C (CFTR/MRP), member 5                    |
| Dnase2a   | 1.3                | 0.8                 | Deoxyribonuclease II alpha                                                 |

**Represents the complete list of inversely regulated differentially expressed genes (annotated genes plus other GenBank accession ID numbers).**

**Fish vs corn oil comparison.** Fold change (relative expression) at 12 h and 10 wk represents fish oil divided by corn oil expression level. All genes have a p-value less than 0.05, indicating that genes were differentially expressed by diet.

(\*Represents an Entrez annotated gene).

| Gene identifier | Fold change (12 h) | Fold change (10 wk) | Description |
|-----------------|--------------------|---------------------|-------------|
|                 |                    |                     |             |

|           |          |          |                                                                                                     |
|-----------|----------|----------|-----------------------------------------------------------------------------------------------------|
| AA850319  | 0.658971 | 1.242944 | Cleavage and polyadenylation specific factor 6                                                      |
| AA850576  | 0.620998 | 1.203828 | Transcribed locus                                                                                   |
| AA963874  | 0.668279 | 1.280113 | Similar to RIKEN cDNA 2700081O15                                                                    |
| AI012250  | 0.527642 | 1.397689 | EST206701 Normalized rat placenta, Bento Soares Rattus sp. cDNA clone RPLAU45 3 end, mRNA sequence. |
| AI045026  | 1.50976  | 0.648048 | Glutamine-fructose-6-phosphate transaminase 2*                                                      |
| AI111803  | 1.301519 | 0.787702 | Transcribed locus                                                                                   |
| AI178257  | 0.64883  | 1.205677 | Transcribed locus                                                                                   |
| AI179372  | 0.73247  | 1.750917 | Transcribed locus                                                                                   |
| AI599104  | 0.663896 | 1.892686 | Chromodomain helicase DNA binding protein 7*                                                        |
| AW142350  | 1.167202 | 0.801924 | Polymerase (DNA directed), epsilon 3 (p17 subunit)*                                                 |
| AW143273  | 1.111811 | 0.818204 | Transcribed locus                                                                                   |
| AW253043  | 0.764801 | 1.996296 | Hypothetical protein LOC685233                                                                      |
| AW532214  | 0.559165 | 1.244409 | Transcribed locus                                                                                   |
| AW916860  | 1.919957 | 0.548431 | Transcribed locus                                                                                   |
| AW920624  | 0.603507 | 1.292021 | Transcribed locus                                                                                   |
| BE103430  | 1.219238 | 0.853299 | Transcribed locus                                                                                   |
| BE104322  | 0.569178 | 1.631607 | Transcribed locus                                                                                   |
| BE110624  | 1.277904 | 0.808098 | Transmembrane protein 218                                                                           |
| BE113655  | 0.478169 | 1.350479 | Double C2, gamma                                                                                    |
| BF290953  | 0.625117 | 1.325599 | Transcribed locus                                                                                   |
| NM_012609 | 0.801702 | 1.429319 | Neurofibromin 1*                                                                                    |
| NM_013200 | 0.563929 | 1.824308 | Carnitine palmitoyltransferase 1b, muscle*                                                          |
| NM_017047 | 0.426692 | 2.645147 | Solute carrier family 10 (sodium/bile acid cotransporter family), member 1*                         |
| NM_017108 | 1.303705 | 0.747027 | Potassium voltage-gated channel, subfamily H (eag-related), member 3*                               |
| NM_022513 | 1.316997 | 0.679511 | Sulfotransferase family, cytosolic, 1B, member 1*                                                   |
| NM_030831 | 1.246035 | 0.786807 | G-protein coupled receptor 12*                                                                      |
| NM_031531 | 1.596907 | 0.696108 | Serine (or cysteine) peptidase inhibitor, clade A, member 3N*                                       |
| NM_031531 | 1.596907 | 0.696108 | Serine (or cysteine) peptidase inhibitor, clade A, member 3N                                        |
| NM_031672 | 1.281305 | 0.834343 | Solute carrier family 15 (H <sup>+</sup> /peptide transporter), member 2*                           |
| NM_031776 | 0.620538 | 1.442399 | Guanine deaminase*                                                                                  |
| NM_053683 | 1.215974 | 0.812313 | NADPH oxidase 1*                                                                                    |
| NM_053924 | 1.255434 | 0.680262 | ATP-binding cassette, subfamily C (CFTR/MRP), member 5*                                             |

|           |          |          |                             |
|-----------|----------|----------|-----------------------------|
| NM_138539 | 1.336824 | 0.773456 | Deoxyribonuclease II alpha* |
|-----------|----------|----------|-----------------------------|



**Supplementary Table 3. Inversely regulated genes at the initiation and progression stages: Olive vs corn oil comparison.** Fold change (relative expression) at 12 h and 10 wk represents olive oil divided by corn oil expression level. All genes have a p-value less than 0.05, indicating that genes were differentially expressed by diet. Only Entrez annotated genes are shown.

| Gene Symbol | fold change (12 h) | fold change (10 wk) | Description                                                           |
|-------------|--------------------|---------------------|-----------------------------------------------------------------------|
| aqp1        | 1.7                | 0.7                 | aquaporin 1                                                           |
| B3galt4     | 1.2                | 0.8                 | UDP-Gal:betaGlcNAc beta 1,3-galactosyltransferase, polypeptide 4      |
| Brca2       | 1.3                | 0.8                 | breast cancer 2                                                       |
| C3          | 1.3                | 0.7                 | complement component 3                                                |
| C4bpa       | 1.3                | 0.7                 | complement component 4 binding protein, alpha                         |
| Cyp1b1      | 1.3                | 0.8                 | cytochrome P450, family 1, subfamily b, polypeptide 1                 |
| ddx20       | 1.1                | 0.8                 | DEAD (Asp-Glu-Ala-Asp) box polypeptide 20                             |
| Edn1        | 1.4                | 0.7                 | endothelin 1                                                          |
| Fos1        | 1.4                | 0.7                 | fos-like antigen 1                                                    |
| Foxa2       | 1.3                | 0.8                 | forkhead box A2                                                       |
| gas7        | 1.4                | 0.7                 | growth arrest specific 7                                              |
| htr2c       | 1.3                | 0.7                 | 5-hydroxytryptamine (serotonin) receptor 2C                           |
| Ighmbp2     | 1.2                | 0.8                 | immunoglobulin mu binding protein 2                                   |
| Kcnh3       | 1.3                | 0.7                 | similar to Potassium voltage-gated channel subfamily H member 3       |
| Kcnj6       | 1.3                | 0.7                 | potassium inwardly-rectifying channel, subfamily J, member 6          |
| Kif2c       | 1.5                | 0.7                 | kinesin family member 2C                                              |
| Lrpap1      | 1.3                | 0.7                 | low density lipoprotein receptor-related protein associated protein 1 |
| Magi2       | 1.4                | 0.7                 | membrane associated guanylate kinase, WW and PDZ domain containing 2  |
| Mkln1       | 1.2                | 0.8                 | muskelin 1, intracellular mediator containing kelch motifs            |
| Mybpc1      | 1.4                | 0.8                 | myosin binding protein C,                                             |

|          |     |     |                                                                             |
|----------|-----|-----|-----------------------------------------------------------------------------|
|          |     |     | slow type                                                                   |
| Nup88    | 1.1 | 0.8 | nucleoporin 88kDa                                                           |
| Psm1     | 1.2 | 0.7 | proteasome (prosome, macropain) 26S subunit, non-ATPase, 1                  |
| Ptgs1    | 1.2 | 0.8 | prostaglandin-endoperoxide synthase 1                                       |
| Sfrs12   | 1.4 | 0.7 | splicing factor, arginine/serine-rich 12                                    |
| Slc10a1  | 0.5 | 1.5 | solute carrier family 10 (sodium/bile acid cotransporter family), member 1  |
| Slc27a1  | 1.2 | 0.8 | solute carrier family 27 (fatty acid transporter), member 1                 |
| Slc37a4  | 1.4 | 0.7 | solute carrier family 37 (glucose-6-phosphate transporter), member 4        |
| Slc6a7   | 1.3 | 0.7 | solute carrier family 6 (neurotransmitter transporter, L-proline), member 7 |
| socs3    | 1.4 | 0.7 | suppressor of cytokine signaling 3                                          |
| sqlE     | 1.3 | 0.7 | squalene epoxidase                                                          |
| Sult1b1  | 1.4 | 0.6 | sulfotransferase family, cytosolic, 1B, member 1                            |
| Tnfrsf1a | 1.2 | 0.7 | tumor necrosis factor receptor superfamily, member 1a                       |
| Tnfrsf1b | 1.2 | 0.7 | tumor necrosis factor receptor superfamily, member 1b                       |
| Trhr     | 1.2 | 0.7 | thyrotropin releasing hormone receptor                                      |
| usf1     | 1.2 | 0.7 | upstream transcription factor 1                                             |

**Represents the complete list of inversely regulated differentially expressed genes (annotated genes plus other GenBank accession ID numbers).**

**Olive vs corn oil comparison.** Fold change (relative expression) at 12 h and 10 wk represents olive oil divided by corn oil expression level. All genes have a p-value less than 0.05, indicating that genes were differentially expressed by diet.

(\*Represents an Entrez annotated gene).

| Gene identifier | Fold change (12 h) | Fold change (10 wk) | Description                             |
|-----------------|--------------------|---------------------|-----------------------------------------|
| AA801116        | 1.643196           | 0.740393            | EST190613 Rattus norvegicus cDNA, 5 end |

|          |          |          |                                                                                                  |
|----------|----------|----------|--------------------------------------------------------------------------------------------------|
| AA818018 | 1.242889 | 0.795805 | Melanocyte proliferating gene 1                                                                  |
| AA819481 | 1.568884 | 0.639055 | Transcribed locus                                                                                |
| AA850319 | 0.598481 | 1.18838  | Cleavage and polyadenylation specific factor 6                                                   |
| AA891790 | 1.226878 | 0.756218 | CDNA clone IMAGE:7368410                                                                         |
| AA900983 | 1.332997 | 0.754234 | Solute carrier family 17 (anion/sugar transporter), member 5                                     |
| AF142499 | 1.230564 | 0.698577 | Tumor necrosis factor receptor superfamily, member 1b*                                           |
| AF220455 | 1.109473 | 0.811358 | DEAD (Asp-Glu-Ala-Asp) box polypeptide 20*                                                       |
| AI009946 | 1.325001 | 0.768638 | Carboxypeptidase M                                                                               |
| AI010234 | 1.499175 | 0.648638 | EH domain binding protein 1                                                                      |
| AI170285 | 1.30156  | 0.799892 | Similar to RIKEN cDNA 0610037L13                                                                 |
| AI176734 | 1.208226 | 0.756801 | Similar to RIKEN cDNA 0610037L13                                                                 |
| AI177590 | 1.201856 | 0.825655 | Component of oligomeric golgi complex 4                                                          |
| AI227843 | 1.342011 | 0.791381 | Transcribed locus                                                                                |
| AI227985 | 1.174883 | 0.786918 | Rhomboid domain containing 3                                                                     |
| AI231716 | 1.53119  | 0.662588 | Transcribed locus                                                                                |
| AI232494 | 1.113878 | 0.792809 | Coenzyme Q9 homolog (S. cerevisiae)                                                              |
| AI233903 | 0.353281 | 1.400709 | Similar to RIKEN cDNA 2410146L05                                                                 |
| AI235950 | 1.512678 | 0.751599 | EST232512 Normalized rat ovary, Bento Soares Rattus sp. cDNA clone ROVCZ23 3 end, mRNA sequence. |
| AI407755 | 1.19616  | 0.741369 | Mesoderm development candidate 1                                                                 |
| AI411222 | 1.165743 | 0.815323 | Tissue inhibitor of metalloproteinase 4                                                          |
| AI547421 | 1.253469 | 0.802468 | Dipeptidyl peptidase 9                                                                           |
| AI556408 | 1.398341 | 0.598355 | Rho guanine nucleotide exchange factor (GEF) 19                                                  |
| AJ131902 | 1.369616 | 0.670395 | Growth arrest specific 7*                                                                        |
| AW141259 | 1.326165 | 0.759728 | Dynein, axonemal, light chain 4                                                                  |
| AW141867 | 1.272456 | 0.742333 | Transcribed locus, strongly similar to NP_032909.2 plexin A3 [Mus musculus]                      |
| AW143273 | 1.104915 | 0.783984 | Transcribed locus                                                                                |
| AW143362 | 1.384833 | 0.769621 | Putative homeodomain transcription factor 1                                                      |
| AW143568 | 1.100982 | 0.781078 | Vacuolar protein sorting 18 homolog (S. cerevisiae)                                              |
| AW915437 | 1.573266 | 0.682941 | Kelch domain containing 8A                                                                       |
| AW915749 | 1.31586  | 0.704766 | Kinesin light chain 2                                                                            |
| AW916344 | 1.364831 | 0.823593 | Similar to RIKEN cDNA 2310033P09                                                                 |
| AW916911 | 1.377017 | 0.722611 | Transcribed locus, strongly similar to NP_056493.3 neurobeachin [Homo sapiens]                   |
| AW916925 | 2.155937 | 0.694751 | Transcribed locus                                                                                |
| AW917562 | 1.216576 | 0.814602 | Transcribed locus                                                                                |
| AW920501 | 1.381473 | 0.771476 | Transcribed locus                                                                                |
| AW920557 | 1.627141 | 0.607488 | Transcribed locus, strongly similar to XP_001077488.1 PREDICTED:                                 |

|           |          |          |                                                                                                                                  |
|-----------|----------|----------|----------------------------------------------------------------------------------------------------------------------------------|
|           |          |          | similar to ankyrin repeat domain 25 [Rattus norvegicus]                                                                          |
| BE096995  | 1.377631 | 0.710732 | Rtf1, Paf1/RNA polymerase II complex component, homolog (S. cerevisiae)                                                          |
| BE103430  | 1.205045 | 0.794914 | Transcribed locus                                                                                                                |
| BE108837  | 1.389721 | 0.58472  | Centromere protein E                                                                                                             |
| BE109075  | 1.244244 | 0.715188 | Zinc finger, FYVE domain containing 21                                                                                           |
| BE113321  | 1.365684 | 0.688609 | Transcribed locus                                                                                                                |
| BF281787  | 1.304783 | 0.657823 | Pyrroline-5-carboxylate synthetase (glutamate gamma-semialdehyde synthetase)                                                     |
| BF282349  | 1.250483 | 0.76502  | Similar to RIKEN cDNA 5830404H04                                                                                                 |
| BF284303  | 1.546268 | 0.770892 | EST448894 Rat Gene Index, normalized rat, Rattus norvegicus cDNA Rattus norvegicus cDNA clone RGIEO12 3 sequence, mRNA sequence. |
| BF284803  | 1.407228 | 0.656037 | Interferon regulatory factor 7                                                                                                   |
| BF393126  | 1.500294 | 0.708604 | Transcribed locus                                                                                                                |
| BF396218  | 1.222925 | 0.736783 | Similar to RIKEN cDNA 0610039J04                                                                                                 |
| BF397523  | 1.251917 | 0.790097 | Family with sequence similarity 32, member A                                                                                     |
| BF400684  | 1.204369 | 0.812748 | Transcribed locus                                                                                                                |
| BF400697  | 1.257016 | 0.791018 | Similar to zinc finger, RAN-binding domain containing 3                                                                          |
| BF401710  | 1.312767 | 0.713884 | T-complex 11 (mouse) like 2                                                                                                      |
| BF414998  | 1.678112 | 0.708815 | Similar to RIKEN cDNA 2610318G18                                                                                                 |
| BF419044  | 1.47497  | 0.666977 | Small G protein signaling modulator 2                                                                                            |
| BF547233  | 1.484874 | 0.714484 | Transcribed locus                                                                                                                |
| BF548454  | 1.214463 | 0.786379 | Transcribed locus                                                                                                                |
| BF558112  | 1.309284 | 0.725678 | Ring finger protein 14                                                                                                           |
| BG671895  | 1.129634 | 0.7941   | Transcribed locus, strongly similar to NP_057131.1 splicing factor 3B, 14 kDa subunit [Homo sapiens]                             |
| NM_012516 | 1.304904 | 0.738308 | Complement component 4 binding protein, alpha*                                                                                   |
| NM_012548 | 1.373679 | 0.688031 | Endothelin 1*                                                                                                                    |
| NM_012743 | 1.277293 | 0.777989 | Forkhead box A2*                                                                                                                 |
| NM_012765 | 1.260934 | 0.742829 | 5-hydroxytryptamine (serotonin) receptor 2C*                                                                                     |
| NM_012778 | 1.749838 | 0.68442  | Aquaporin 1*                                                                                                                     |
| NM_012940 | 1.262793 | 0.781185 | Cytochrome P450, family 1, subfamily b, polypeptide 1*                                                                           |
| NM_012953 | 1.406039 | 0.726107 | Fos-like antigen 1*                                                                                                              |
| NM_013047 | 1.182974 | 0.741419 | Thyrotropin releasing hormone receptor*                                                                                          |
| NM_013091 | 1.238357 | 0.718651 | Tumor necrosis factor receptor superfamily, member 1a*                                                                           |
| NM_013192 | 1.278628 | 0.745767 | Potassium inwardly-rectifying channel, subfamily J, member 6*                                                                    |

|           |          |          |                                                                                           |
|-----------|----------|----------|-------------------------------------------------------------------------------------------|
| NM_016994 | 1.323341 | 0.748975 | Complement component 3*                                                                   |
| NM_017043 | 1.25072  | 0.758844 | Prostaglandin-endoperoxide synthase 1*                                                    |
| NM_017047 | 0.472064 | 1.52303  | Solute carrier family 10 (sodium/bile acid cotransporter family), member 1*               |
| NM_017047 | 0.472064 | 1.52303  | Solute carrier family 10 (sodium/bile acid cotransporter family), member 1                |
| NM_017108 | 1.277403 | 0.696651 | Potassium voltage-gated channel, subfamily H (eag-related), member 3*                     |
| NM_017136 | 1.331414 | 0.677935 | Squalene epoxidase*                                                                       |
| NM_019376 | 1.263714 | 0.632482 | Tyrosine 3-monooxygenase/tryptophan 5-monooxygenase activation protein, gamma polypeptide |
| NM_020092 | 1.393965 | 0.749656 | Splicing factor, arginine/serine-rich 12*                                                 |
| NM_022513 | 1.378612 | 0.600983 | Sulfotransferase family, cytosolic, 1B, member 1*                                         |
| NM_031359 | 1.237554 | 0.842521 | Muskelin 1, intracellular mediator containing kelch motifs*                               |
| NM_031542 | 1.280391 | 0.786489 | Breast cancer 2*                                                                          |
| NM_031586 | 1.175927 | 0.835505 | Immunoglobulin mu binding protein 2*                                                      |
| NM_031589 | 1.403112 | 0.718249 | Solute carrier family 37 (glucose-6-phosphate transporter), member 4*                     |
| NM_031777 | 1.171772 | 0.680362 | Upstream transcription factor 1*                                                          |
| NM_031978 | 1.179079 | 0.7332   | Proteasome (prosome, macropain) 26S subunit, non-ATPase, 1*                               |
| NM_053565 | 1.411427 | 0.747492 | Suppressor of cytokine signaling 3*                                                       |
| NM_053580 | 1.178213 | 0.79833  | Solute carrier family 27 (fatty acid transporter), member 1*                              |
| NM_053616 | 1.107625 | 0.766923 | Nucleoporin 88kDa*                                                                        |
| NM_053621 | 1.366427 | 0.721561 | Membrane associated guanylate kinase, WW and PDZ domain containing 2*                     |
| NM_053996 | 1.306778 | 0.701811 | Solute carrier family 6 (neurotransmitter transporter, L-proline), member 7*              |
| NM_133553 | 1.16782  | 0.801158 | UDP-Gal:betaGlcNAc beta 1,3-galactosyltransferase, polypeptide 4*                         |
| U44979    | 1.474103 | 0.691397 | kinesin family member 2C*                                                                 |
| U46958    | 1.253258 | 0.775536 | Rattus norvegicus hyaluronan-binding protein CD44i mRNA, partial cds.                     |
| X90475    | 1.367227 | 0.753309 | Myosin binding protein C, slow type*                                                      |
| Z11994    | 1.332941 | 0.708551 | Low density lipoprotein receptor-related protein associated protein 1*                    |

**Supplementary Table 4. Classification of fish versus olive oil colonic expression values at the initiation stage (12 h).** The top 10 single, pair-wise, and triplet-wise gene LDA classifiers are shown.  $\epsilon_{\text{bolstered}}$  denotes bolstered resubstitution error for the respective classifier; the classifiers are ranked according to that error measurement.  $\Delta \epsilon_{\text{bolstered}}$  denotes the decrease in error for each feature set relative to its highest ranked subset of features.

| 1 feature | 2 feature | 3 feature | $\epsilon_{\text{bolstered}}$ | $\Delta \epsilon_{\text{bolstered}}$ |
|-----------|-----------|-----------|-------------------------------|--------------------------------------|
| Sfrp2     |           |           | 0.0726                        |                                      |
| Plcg1     |           |           | 0.1268                        |                                      |
| Notch1    |           |           | 0.1298                        |                                      |
| Bdkrb2    |           |           | 0.1407                        |                                      |
| Tcf4      |           |           | 0.1495                        |                                      |
| Tat       |           |           | 0.156                         |                                      |
| Efnb1     |           |           | 0.161                         |                                      |
| Gsr       |           |           | 0.1633                        |                                      |
| Lamr1     |           |           | 0.1692                        |                                      |
| Pla2g2c   |           |           | 0.1748                        |                                      |
| Sfrp2     | Nppa      |           | 0.0108                        | 0.0618                               |
| Bdkrb2    | Pde4d     |           | 0.0126                        | 0.1281                               |
| Bdkrb2    | Ceacam3   |           | 0.0166                        | 0.1241                               |
| Sfrp2     | Tnf       |           | 0.0227                        | 0.0499                               |
| Bdkrb2    | Bmp4      |           | 0.0243                        | 0.1164                               |
| Bdkrb2    | Gja1      |           | 0.0303                        | 0.1104                               |
| Sfrp2     | Men1      |           | 0.0305                        | 0.0421                               |
| Tcf4      | Sfrp2     |           | 0.0308                        | 0.0418                               |
| Sfrp2     | Tat       |           | 0.0315                        | 0.0411                               |
| Col18a1   | Bdkrb2    |           | 0.034                         | 0.1067                               |
| Sfrp2     | Nppa      | Ltbp1     | 0.0032                        | 0.0076                               |
| Ncam1     | Sfrp2     | Nppa      | 0.0034                        | 0.0193                               |
| Sfrp2     | Nppa      | Pi3ka     | 0.0039                        | 0.0069                               |
| Sfrp2     | Nppa      | Syp       | 0.004                         | 0.0068                               |
| Sfrp2     | Nppa      | hoxa1     | 0.004                         | 0.0068                               |
| Sfrp2     | Nppa      | Skr6r     | 0.0041                        | 0.0067                               |
| Sfrp2     | Nppa      | Nes       | 0.0042                        | 0.0066                               |
| Sfrp2     | Nppa      | Sycp3     | 0.0045                        | 0.0063                               |

**Supplementary Table 5. Classification of fish versus corn oil colonic expression values at the initiation stage (12 h).** The top 10 single, pair-wise, and triplet-wise gene LDA classifiers are shown.  $\epsilon_{\text{bolstered}}$  denotes bolstered resubstitution error for the respective classifier; the classifiers are ranked according to that error measurement.  $\Delta \epsilon_{\text{bolstered}}$  denotes the decrease in error for each feature set relative to its highest ranked subset of features.

| 1 feature | 2 feature | 3 feature | $\epsilon_{\text{bolstered}}$ | $\Delta \epsilon_{\text{bolstered}}$ |
|-----------|-----------|-----------|-------------------------------|--------------------------------------|
| Efnb1     |           |           | 0.0002                        |                                      |
| Nras      |           |           | 0.1031                        |                                      |
| Bmp4      |           |           | 0.1579                        |                                      |
| Serpinh2  |           |           | 0.1734                        |                                      |
| Tgfb1     |           |           | 0.1747                        |                                      |
| Pkcb      |           |           | 0.1866                        |                                      |
| Hnf3g     |           |           | 0.1883                        |                                      |
| Gja1      |           |           | 0.1884                        |                                      |
| Rbbp9     |           |           | 0.2005                        |                                      |
| Esr       | Efnb1     |           | 0                             | 0.0002                               |
| Ucp3      | Efnb1     |           | 0                             | 0.0002                               |
| Efnb1     | Ltbp1     |           | 0                             | 0.0002                               |
| Gpx4      | Efnb1     |           | 0.0001                        | 0.0001                               |
| Prkm7     | Efnb1     |           | 0.0001                        | 0.0001                               |
| Kras2     | Efnb1     |           | 0.0001                        | 0.0001                               |
| Bmpr2     | Efnb1     | Bcl2l2    | 0                             | 0.0002                               |
| Itgb7     | Mapk7     | Efnb1     | 0                             | 0.0002                               |
| Gpx4      | Mapk7     | Efnb1     | 0                             | 0.0001                               |
| Gpx4      | Bdkrb2    | Efnb1     | 0                             | 0.0001                               |
| Gpx4      | Ucp3      | Efnb1     | 0                             | 0                                    |
| Mapk7     | Cacnb4    | Efnb1     | 0                             | 0.0001                               |

**Supplementary Table 6. Classification of olive versus corn oil colonic expression values at the initiation stage (12 h).** The top 10 single, pair-wise, and triplet-wise gene LDA classifiers are shown.  $\epsilon_{\text{bolstered}}$  denotes bolstered resubstitution error for the respective classifier; the classifiers are ranked according to that error measurement.  $\Delta \epsilon_{\text{bolstered}}$  denotes the decrease in error for each feature set relative to its highest ranked subset of features.

| 1 feature | 2 feature | 3 feature | $\epsilon_{\text{bolstered}}$ | $\Delta \epsilon_{\text{bolstered}}$ |
|-----------|-----------|-----------|-------------------------------|--------------------------------------|
| Lamr1     |           |           | 0.1023                        |                                      |
| Ywhag     |           |           | 0.1041                        |                                      |
| Id3       |           |           | 0.1109                        |                                      |
| Rb1       |           |           | 0.1252                        |                                      |
| Nras      |           |           | 0.1381                        |                                      |
| Serpinh2  |           |           | 0.1554                        |                                      |
| Alcam     |           |           | 0.1619                        |                                      |
| Sparc     |           |           | 0.1739                        |                                      |
| Colia1    |           |           | 0.1829                        |                                      |
| anx5      | Serpinh2  |           | 0.0465                        | 0.1089                               |
| Id1       | Lamr1     |           | 0.0466                        | 0.0557                               |
| Pparg     | Lamr1     |           | 0.0493                        | 0.053                                |
| Prkm7     | Ywhag     |           | 0.0523                        | 0.0518                               |
| Sparc     | anx5      |           | 0.0575                        | 0.1164                               |
| ErbB2     | Ywhag     |           | 0.0583                        | 0.0458                               |
| Mfap4     | Ywhag     |           | 0.0608                        | 0.0433                               |
| Sell      | Ywhag     |           | 0.0621                        | 0.042                                |
| Bmp4      | anx5      |           | 0.0638                        | 0.1228                               |
| Hnf3b     | Id1       | Lamr1     | 0.0261                        | 0.0205                               |
| Ncam1     | anx5      | Serpinh2  | 0.0269                        | 0.0196                               |
| Id1       | Id3       | Lamr1     | 0.0277                        | 0.0189                               |
| Rep3a     | anx5      | Serpinh2  | 0.0281                        | 0.0184                               |
| Id1       | ErbB2     | Lamr1     | 0.0291                        | 0.0175                               |
| anx5      | Pde4d     | Serpinh2  | 0.0293                        | 0.0172                               |
| Gpx4      | anx5      | Serpinh2  | 0.0297                        | 0.0168                               |
| Id3       | Pparg     | Lamr1     | 0.0309                        | 0.0184                               |
| Lyz2      | Id1       | Lamr1     | 0.0311                        | 0.0155                               |



**Supplementary Table 7. Classification of fish versus olive oil colonic expression values at the progression stage (10 wk).** The top 10 single, pair-wise, and triplet-wise gene LDA classifiers are shown.  $\epsilon_{\text{bolstered}}$  denotes bolstered resubstitution error for the respective classifier; the classifiers are ranked according to that error measurement.  $\Delta \epsilon_{\text{bolstered}}$  denotes the decrease in error for each feature set relative to its highest ranked subset of features.

| 1 feature | 2 feature | 3 feature | $\epsilon_{\text{bolstered}}$ | $\Delta \epsilon_{\text{bolstered}}$ |
|-----------|-----------|-----------|-------------------------------|--------------------------------------|
| Bdkrb2    |           |           | 0.1004                        |                                      |
| Ca3       |           |           | 0.1618                        |                                      |
| Pik3r1    |           |           | 0.1625                        |                                      |
| Grem1     |           |           | 0.1686                        |                                      |
| Pai2a     |           |           | 0.1736                        |                                      |
| Raf1      |           |           | 0.1774                        |                                      |
| Tnfrsf1a  |           |           | 0.1919                        |                                      |
| Arg2      |           |           | 0.1963                        |                                      |
| IL2RB     |           |           | 0.2043                        |                                      |
| Plat      |           |           | 0.219                         |                                      |
| Bdkrb2    | Ceacam3   |           | 0.0453                        | 0.0551                               |
| elk       | Bdkrb2    |           | 0.0496                        | 0.0508                               |
| Bdkrb2    | Il2rb     |           | 0.0564                        | 0.044                                |
| Bdkrb2    | Sell      |           | 0.0628                        | 0.0376                               |
| Plat      | Ca3       |           | 0.0642                        | 0.0976                               |
| Bdkrb2    | hoxa1     |           | 0.0648                        | 0.0356                               |
| Bdkrb2    | Bmp4      |           | 0.0672                        | 0.0332                               |
| Bdkrb2    | Rbbp9     |           | 0.0693                        | 0.0311                               |
| Bdkrb2    | Gja1      |           | 0.0727                        | 0.0277                               |
| Mapk7     | Bdkrb2    |           | 0.0735                        | 0.0269                               |
| elk       | Bdkrb2    | Rbbp9     | 0.0233                        | 0.0263                               |
| Bdkrb2    | Il2rb     | Rbbp9     | 0.0238                        | 0.0326                               |
| Bdkrb2    | Ceacam3   | Serpinh2  | 0.0312                        | 0.0141                               |
| Bdkrb2    | Col2a1    | Rbbp9     | 0.0321                        | 0.0372                               |
| Itgb7     | Bdkrb2    | Ceacam3   | 0.0321                        | 0.0132                               |
| Bdkrb2    | Ceacam3   | Shh       | 0.0325                        | 0.0128                               |
| Bdkrb2    | Ceacam3   | Tgfb1     | 0.0335                        | 0.0118                               |
| Bdkrb2    | Ceacam3   | Pkcb      | 0.0342                        | 0.0111                               |
| elk       | Bdkrb2    | Shh       | 0.0351                        | 0.0145                               |
| Bdkrb2    | hoxa1     | Rbbp9     | 0.0372                        | 0.0321                               |

**Supplementary Table 8. Classification of fish versus corn oil colonic expression values at the progression stage (10 wk).** The top 10 single, pair-wise, and triplet-wise gene LDA classifiers are shown.  $\epsilon_{\text{bolstered}}$  denotes bolstered resubstitution error for the respective classifier; the classifiers are ranked according to that error measurement.  $\Delta \epsilon_{\text{bolstered}}$  denotes the decrease in error for each feature set relative to its highest ranked subset of features.

| 1 feature | 2 feature | 3 feature | $\epsilon_{\text{bolstered}}$ | $\Delta \epsilon_{\text{bolstered}}$ |
|-----------|-----------|-----------|-------------------------------|--------------------------------------|
| Hoxa1     |           |           | 0.0463                        |                                      |
| Bmp4      |           |           | 0.0547                        |                                      |
| Grem1     |           |           | 0.0666                        |                                      |
| Serpinh2  |           |           | 0.1071                        |                                      |
| Tgfb1     |           |           | 0.1137                        |                                      |
| Ca3       |           |           | 0.1362                        |                                      |
| Tgfbr3    |           |           | 0.1459                        |                                      |
| elk       |           |           | 0.1478                        |                                      |
| Apt1lg1   |           |           | 0.152                         |                                      |
| Pkcb      |           |           | 0.1527                        |                                      |
| Hoxa1     | Grem1     |           | 0.0192                        | 0.0271                               |
| Bmp4      | Pla2g2c   |           | 0.0203                        | 0.0344                               |
| Bdkrb2    | Bmp4      |           | 0.0225                        | 0.0322                               |
| Bdkrb2    | Grem1     |           | 0.0247                        | 0.0419                               |
| Bmp4      | Hoxa1     |           | 0.0288                        | 0.0175                               |
| Gpx4      | Hoxa1     |           | 0.0326                        | 0.0137                               |
| Fgfr2     | Hoxa1     |           | 0.0332                        | 0.0131                               |
| Pla2g2c   | Grem1     |           | 0.0347                        | 0.0319                               |
| Foxa1     | Bmp4      | Pla2g2c   | 0.0085                        | 0.0118                               |
| Cacnb4    | Bdkrb2    | Bmp4      | 0.0119                        | 0.0106                               |
| Bmp4      | Pla2g2c   | LTBP1     | 0.0152                        | 0.0051                               |
| Esr       | BMP4      | Pla2g2c   | 0.0158                        | 0.0045                               |
| Gpx4      | Bdkrb2    | Bmp4      | 0.0161                        | 0.0064                               |
| Bdkrb2    | Ucp       | Bmp4      | 0.0174                        | 0.0051                               |
| Bdkrb2    | Bmp4      | Sycp3     | 0.0174                        | 0.0051                               |
| Gpx4      | Hoxa1     | Tgfb1     | 0.0185                        | 0.0141                               |

**Supplementary Table 9. Classification of olive versus corn oil colonic expression values at the progression stage (10 wk).** The top 10 single, pair-wise, and triplet-wise gene LDA classifiers are shown.  $\epsilon_{\text{bolstered}}$  denotes bolstered resubstitution error for the respective classifier; the classifiers are ranked according to that error measurement.  $\Delta \epsilon_{\text{bolstered}}$  denotes the decrease in error for each feature set relative to its highest ranked subset of features.

| 1 feature | 2 feature | 3 feature | $\epsilon_{\text{bolstered}}$ | $\Delta \epsilon_{\text{bolstered}}$ |
|-----------|-----------|-----------|-------------------------------|--------------------------------------|
| Bmp4      |           |           | 0.0515                        |                                      |
| Serpinh2  |           |           | 0.0738                        |                                      |
| Pkcb      |           |           | 0.1128                        |                                      |
| Sparc     |           |           | 0.1212                        |                                      |
| Rac1      |           |           | 0.134                         |                                      |
| elk       |           |           | 0.1429                        |                                      |
| Cchla2    |           |           | 0.1739                        |                                      |
| Gja1      |           |           | 0.1797                        |                                      |
| Tgfb1     |           |           | 0.1841                        |                                      |
| Pdir      |           |           | 0.1885                        |                                      |
| Bmp4      | Col2a1    |           | 0.0245                        | 0.027                                |
| Pkcb      | Bmp4      |           | 0.0249                        | 0.0266                               |
| NGFR      | Bmp4      |           | 0.0254                        | 0.0261                               |
| elk       | Bmp4      |           | 0.0283                        | 0.0232                               |
| Bmp4      | Pla2g2c   |           | 0.0288                        | 0.0227                               |
| Pkcb      | Serpinh2  |           | 0.0312                        | 0.0426                               |
| Bmp4      | Serpinh2  |           | 0.0327                        | 0.0188                               |
| Bmp4      | Cchla2    |           | 0.0372                        | 0.0143                               |
| Esr       | Bmp4      |           | 0.0389                        | 0.0126                               |
| Egf       | Serpinh2  |           | 0.0389                        | 0.0126                               |
| elk       | Bmp4      | Ptger1    | 0.0141                        | 0.0142                               |
| Sparc     | Egf       | Serpinh2  | 0.0164                        | 0.0225                               |
| Bmp4      | Col2a1    | Nes       | 0.0169                        | 0.0076                               |
| Pkcb      | Bmp4      | Serpinh2  | 0.0172                        | 0.0077                               |
| Pkcb      | Bmp4      | Shh       | 0.0213                        | 0.0036                               |
| Bmp4      | Cchla2    | Serpinh2  | 0.0238                        | 0.0089                               |
| Ngfr      | Bmp4      | Hpta      | 0.027                         |                                      |
| Gpx4      | Bmp4      | Serpinh2  | 0.0279                        | 0.0048                               |
